# Supplementary material for: BMI at Age 17 Years and Diabetes Mortality in Midlife: A Nationwide Cohort of 2.3 Million Adolescents
Source: Oxford University Press journal article supplement (doi:10.2337/dc16-1203), 2016-10-11

# SUPPLEMENTARY DATA

## Table of Contents

| Content   | Description                                                                                                                                                                        | page  |
|-----------|------------------------------------------------------------------------------------------------------------------------------------------------------------------------------------|-------|
| Table S1  | Unadjusted association of covariates with DM mortality: Cox proportional hazards models                                                                                            | 2     |
| Table S2  | Causes of death in the cohort and in the Jewish population of Israel                                                                                                               | 3     |
| Table S3  | DM mortality rates by age attained by the end of the follow-up.                                                                                                                    | 4     |
| Table S4  | Analysis restricted to participants with unimpaired health status at enrolment                                                                                                     | 5     |
| Table S5  | Sex-specific analysis of the association between adolescent BMI and DM mortality (using the 25 <sup>th</sup> -49 <sup>th</sup> BMI percentile group as the reference)              | 6-7   |
| Table S6  | The association between BMI and DM mortality restricted to participants who were examined between 1967 and 1977                                                                    | 8-9   |
| Table S7  | Assessing the association between adolescent BMI and DM mortality with follow-up commencing at age at examination for all participants.                                            | 10    |
| Table S8  | Competing risk models                                                                                                                                                              | 11    |
| Table S9  | Assessing the association between adolescent BMI and DM mortality using the currently defined normal BMI (BMI CDC percentiles 5 <sup>th</sup> -84 <sup>th</sup> ) as the reference | 12    |
| Table S10 | The association between adolescent BMI and DM mortality stratified by deaths occurring $\leq 50$ years of age and those occurring $> 50$ years of age                              | 13    |
| Table S11 | The association between adolescent BMI and DM mortality: A sensitivity analysis restricted to participants who attained the age of at least 35 years during follow-up              | 14    |
| Table S12 | Analysis of the association of adolescent BMI with DM mortality after excluding examinees with a diagnosis of diabetes at age 17.                                                  | 15    |
| Table S13 | Analysis of the association of adolescent BMI with DM mortality after excluding deaths attributed to Type 1 diabetes                                                               | 16    |
| Table S14 | Analysis of the association of adolescent BMI with mortality attributed to Type 2 diabetes or to unspecified diabetes.                                                             | 17-18 |

# SUPPLEMENTARY DATA

**Supplementary Table S1.** Unadjusted association of covariates with DM-related mortality: Cox proportional hazards models. Note that there were 481 deaths attributed to diabetes.

|                          | <b>Diabetes Mortality</b> |           |        |
|--------------------------|---------------------------|-----------|--------|
|                          | HR                        | 95% CI    | p      |
| <b>Height</b>            | 0.95                      | 0.89-0.99 | <0.001 |
| <b>SES</b>               |                           |           | 0.002  |
| Low                      | 1.59                      | 1.21-1.99 | 0.001  |
| Medium                   | 1.53                      | 1.16-2.03 | 0.003  |
| High                     | 1 (ref)                   |           |        |
| <b>Education</b>         |                           |           | <0.001 |
| <9                       | 3.65                      | 2.90-4.58 | <0.001 |
| 10                       | 2.25                      | 1.68-3.02 | <0.001 |
| 11                       | 2.46                      | 1.77-3.42 | <0.001 |
| 12                       | 1 (ref)                   |           |        |
| <b>Country of origin</b> |                           |           | 0.005  |
| Israel                   | 1.20                      | 0.72-1.98 | 0.47   |
| USSR                     | 1.51                      | 1.07-2.13 | 0.021  |
| Asia                     | 1.00                      | 0.78-1.28 | 0.99   |
| Africa                   | 1.46                      | 1.16-1.84 | 0.001  |
| Europe                   | 1 (ref)                   |           |        |

# SUPPLEMENTARY DATA

**Supplementary Table S2. Main causes of death in the cohort and in the general Jewish population in Israel.** Causes of death were grouped according to the International Classification of Diseases (ICD) coding. The number of deaths and the proportions of all deaths occurring in each category (a) within the current cohort relate to 1981 onwards, and (b) among the entire Jewish population of Israel at comparable ages between 2000 and 2011 as reported by the Israeli Ministry of Health (during which 88.4% of all DM deaths occurred in our cohort). Note that the causes of death occurring before 25 years of age (n=6,227 deaths including only one death ascribed to diabetes) are not shown in the age-specific presentation. 'Injury and poisoning' accounted for over two thirds of these early deaths.

| Cause                                                                     | ICD code                                   | Age 25-44     | Age 45-64     |
|---------------------------------------------------------------------------|--------------------------------------------|---------------|---------------|
| <b>(a) Current cohort</b>                                                 |                                            |               |               |
| Diabetes                                                                  | ICD9:250<br>ICD10:E08-13                   | 87 (0.6%)     | 393 (3.3%)    |
| Injury & poisoning*                                                       | ICD9:800-999<br>ICD10: S00-T98,<br>V01-Y98 | 5,180 (37.1%) | 1,311 (11.0%) |
| Neoplasms                                                                 | ICD9: 140-239<br>ICD10: C00-D48            | 3,520 (25.2%) | 4,798 (40.2%) |
| Diseases of circulatory system                                            | ICD9: 390-459<br>ICD10: I00-I99            | 1,196 (8.6%)  | 1,851(15.5%)  |
| <b>(b) <u>Among the Jewish population of Israel between 2001-2011</u></b> |                                            |               |               |
| Diabetes                                                                  | ICD10:E08-13                               | 11 (1.2%)     | 196 (4.6%)    |
| Injury & poisoning*                                                       | ICD10: S00-T98,<br>V01-Y98                 | 311 (33.4%)   | 306 (7.1%)    |
| Neoplasms                                                                 | ICD10: C00-D48                             | 268 (28.8%)   | 1934 (45.0%)  |
| Diseases of circulatory system                                            | ICD10: I00-I99                             | 74 (8.0%)     | 726 (16.9%)   |

\*Including suicide and homicide

## SUPPLEMENTARY DATA

### **Supplementary Table S3. DM mortality rates by age attained during follow-up.**

In this analysis we calculated DM mortality rates based on the number of deaths from diabetes that occurred within the given age range and the person time of participants within that age category. Please note that since all participants in the study had some period of follow-up after age 17 they all were included in the <35 year group.

|                                                   | <b>Age Attained during the Follow-up [years]</b> |              |              |              |              |              |            |
|---------------------------------------------------|--------------------------------------------------|--------------|--------------|--------------|--------------|--------------|------------|
|                                                   | <b>&lt;35</b>                                    | <b>35-39</b> | <b>40-44</b> | <b>45-49</b> | <b>50-54</b> | <b>55-59</b> | <b>≥60</b> |
| Total N                                           | 2,294,139                                        | 1,203,855    | 892,197      | 647,842      | 437,477      | 246,902      | 72,693     |
| Number of deaths                                  | 13                                               | 19           | 56           | 113          | 148          | 116          | 16         |
| Cumulative follow-up (person-years)               | 27,994,329                                       | 5,199,000    | 3,820,007    | 2,699,004    | 1,713,540    | 790,469      | 80,658     |
| DM mortality rate (/10 <sup>5</sup> person years) | 0.05                                             | 0.37         | 1.47         | 4.19         | 8.64         | 14.67        | 19.84      |

# SUPPLEMENTARY DATA

**Supplementary Table S4. Analysis of the association of BMI with DM mortality for adolescents with unimpaired health status.** This analysis was restricted to 1,666,118 adolescents (72.6% of the cohort) whose medical examination revealed no current chronic medical condition, no chronic medical treatment and no previous history of such conditions that affect physical fitness. In this subcohort, there were 331 deaths attributed to DM during follow-up. Cox proportional hazards models were adjusted for age at examination, birth year, and sex (Model 1), and additionally for socio-economic status, country of origin, education level and height (Model 2).

(a) BMI  
classified by  
US-CDC  
percentiles

| BMI percentiles | <5 <sup>th</sup> | 5 <sup>th</sup> -24 <sup>th</sup> | 25 <sup>th</sup> -49 <sup>th</sup> | 50 <sup>th</sup> -74 <sup>th</sup> | 75 <sup>th</sup> -84 <sup>th</sup> | 85 <sup>th</sup> -94 <sup>th</sup> | ≥95 <sup>th</sup> |
|-----------------|------------------|-----------------------------------|------------------------------------|------------------------------------|------------------------------------|------------------------------------|-------------------|
| HR (unadjusted) | 1.04             | 1 (ref)                           | 1.47                               | 1.54                               | 3.67                               | 7.63                               | 19.46             |
| 95% CI          | 0.48-2.26        |                                   | 0.96-2.24                          | 1.00-2.35                          | 2.35-5.73                          | 5.04-11.56                         | 12.28-30.83       |
| P               | 0.92             |                                   | 0.08                               | 0.048                              | <0.001                             | <0.001                             | <0.001            |
| HR (model 1)    | 1.11             | 1 (ref)                           | 1.48                               | 1.63                               | 3.96                               | 8.09                               | 19.21             |
| 95% CI          | 0.52-2.38        |                                   | 0.97-2.27                          | 1.03-2.45                          | 2.55-6.44                          | 5.29-12.42                         | 12.11-30.28       |
| P               | 0.82             |                                   | 0.071                              | 0.028                              | <0.001                             | <0.001                             | <0.001            |
| HR (model 2)    | 1.19             | 1 (ref)                           | 1.50                               | 1.69                               | 4.27                               | 8.60                               | 18.75             |
| 95% CI          | 0.55-2.58        |                                   | 0.98-2.30                          | 1.10-2.59                          | 2.73-6.68                          | 5.66-13.05                         | 11.80-29.81       |
| P               | 0.66             |                                   | 0.061                              | 0.017                              | <0.001                             | <0.001                             | <0.001            |

(b) BMI classified by kg/m<sup>2</sup>

| BMI range       | <17.5     | 17.5-19.9 | 20.0-22.4 | 22.5-24.9 | 25.0-27.4  | 27.5-29.9  | ≥30.0       |
|-----------------|-----------|-----------|-----------|-----------|------------|------------|-------------|
| HR (unadjusted) | 0.88      | 1 (ref)   | 1.48      | 2.67      | 6.46       | 10.20      | 21.29       |
| 95% CI          | 0.35-2.21 |           | 1.03-2.12 | 1.84-3.86 | 4.39-9.51  | 6.42-16.19 | 13.35-34.05 |
| P               | 0.78      |           | 0.032     | <0.001    | <0.001     | <0.001     | <0.001      |
| HR (model 1)    | 1.20      | 1 (ref)   | 1.36      | 2.48      | 6.10       | 10.05      | 22.25       |
| 95% CI          | 0.48-3.03 |           | 0.95-1.95 | 1.71-3.59 | 4.14-8.98  | 6.33-15.96 | 13.95-35.50 |
| P               | 0.70      |           | 0.095     | <0.001    | <0.001     | <0.001     | <0.001      |
| HR (model 2)    | 1.20      | 1 (ref)   | 1.43      | 2.86      | 7.16       | 11.44      | 23.41       |
| 95% CI          | 0.48-3.04 |           | 1.00-2.05 | 1.97-4.15 | 4.85-10.57 | 7.19-18.21 | 14.64-37.43 |
| P               | 0.70      |           | 0.051     | <0.001    | <0.001     | <0.001     | <0.001      |

# SUPPLEMENTARY DATA

**Supplementary Table S5. Sex-specific analysis of the association between adolescent BMI and DM mortality.** There were 432 and 49 diabetes deaths among men and women, respectively. Cox proportional hazards models were adjusted for age at examination, birth year, and sex (Model 1), and additionally for socio-economic status, country of origin, education level and height (Model 2). The 25<sup>th</sup>-49<sup>th</sup> percentile group was used as the reference as there were no DM deaths among women in the 5<sup>th</sup>-24<sup>th</sup> percentiles.

| BMI percentiles      | <5 <sup>th</sup> | 5 <sup>th</sup> -24 <sup>th</sup> | 25 <sup>th</sup> -49 <sup>th</sup> | 50 <sup>th</sup> -74 <sup>th</sup> | 75 <sup>th</sup> -84 <sup>th</sup> | 85 <sup>th</sup> -94 <sup>th</sup> | ≥95 <sup>th</sup> |
|----------------------|------------------|-----------------------------------|------------------------------------|------------------------------------|------------------------------------|------------------------------------|-------------------|
| Men (n=432 deaths)   |                  |                                   |                                    |                                    |                                    |                                    |                   |
| Cases                | 16               | 47                                | 81                                 | 70                                 | 58                                 | 91                                 | 69                |
| HR (unadjusted)      | 0.73             | 0.70                              | 1 (ref)                            | 1.01                               | 2.61                               | 5.13                               | 10.59             |
| 95% CI               | 0.43-1.25        | 0.49-1.00                         |                                    | 0.73-1.39                          | 1.86-3.66                          | 3.80-6.92                          | 7.68-14.61        |
| P                    | 0.26             | 0.052                             |                                    | 0.96                               | <0.001                             | <0.001                             | <0.001            |
| HR (model 1)         | 0.85             | 0.74                              | 1 (ref)                            | 0.98                               | 2.51                               | 4.97                               | 11.43             |
| 95% CI               | 0.50-1.45        | 0.52-1.06                         |                                    | 0.71-1.35                          | 1.79-3.52                          | 3.68-6.71                          | 8.29-15.76        |
| P                    | 0.55             | 0.104                             |                                    | 0.91                               | <0.001                             | <0.001                             | <0.001            |
| HR (model 2)         | 0.81             | 0.72                              | 1 (ref)                            | 1.03                               | 2.75                               | 5.40                               | 11.51             |
| 95% CI               | 0.47-1.38        | 0.50-1.03                         |                                    | 0.75-1.42                          | 1.96-3.85                          | 3.99-7.30                          | 8.31-15.93        |
| P                    | 0.43             | 0.072                             |                                    | 0.84                               | <0.001                             | <0.001                             | <0.001            |
| Women (n=49 deaths)  |                  |                                   |                                    |                                    |                                    |                                    |                   |
| Cases                | 2                | 0                                 | 6                                  | 14                                 | 9                                  | 13                                 | 5                 |
| HR (unadjusted)      | 2.43             | ---                               | 1 (ref)                            | 2.27                               | 4.03                               | 8.02                               | 17.45             |
| 95% CI               | 0.49-12.05       | ---                               |                                    | 0.87-5.90                          | 1.44-11.33                         | 3.05-21.10                         | 5.31-57.31        |
| P                    | 0.27             | ---                               |                                    | 0.094                              | 0.008                              | <0.001                             | <0.001            |
| HR (model 1)         | 2.72             | ---                               | 1 (ref)                            | 2.26                               | 4.11                               | 8.51                               | 21.51             |
| 95% CI               | 0.55-13.05       | ---                               |                                    | 0.87-5.89                          | 1.46-11.54                         | 3.23-22.39                         | 6.53-70.90        |
| P                    | 0.22             | ---                               |                                    | 0.96                               | 0.094                              | <0.001                             | <0.001            |
| HR (model 2)         | 2.70             | ---                               | 1 (ref)                            | 2.24                               | 3.93                               | 7.81                               | 18.74             |
| 95% CI               | 0.54-13.42       | ---                               |                                    | 0.86-5.82                          | 1.40-11.04                         | 2.96-20.61                         | 5.67-62.01        |
| P                    | 0.23             | ---                               |                                    | 0.10                               | 0.01                               | <0.001                             | <0.001            |
| Total (n=481 deaths) |                  |                                   |                                    |                                    |                                    |                                    |                   |
| Cases                | 18               | 47                                | 87                                 | 84                                 | 67                                 | 104                                | 74                |
| HR (unadjusted)      | 0.93             | 0.71                              | 1 (ref)                            | 1.05                               | 2.50                               | 5.06                               | 12.45             |
| 95% CI               | 0.56-1.55        | 0.50-1.01                         |                                    | 0.78-1.42                          | 1.82-3.43                          | 3.80-6.72                          | 9.13-16.98        |
| P                    | 0.79             | 0.059                             |                                    | 0.63                               | <0.001                             | <0.001                             | <0.001            |

## SUPPLEMENTARY DATA

|              |           |           |         |           |           |           |            |
|--------------|-----------|-----------|---------|-----------|-----------|-----------|------------|
| HR (model 1) | 0.93      | 0.71      | 1 (ref) | 1.08      | 2.62      | 5.22      | 12.01      |
| 95% CI       | 0.56-1.55 | 0.50-1.01 |         | 0.80-1.45 | 1.91-3.61 | 3.93-6.94 | 8.81-16.38 |
| P            | 0.79      | 0.056     |         | 0.63      | <0.001    | <0.001    | <0.001     |
| HR (model 2) | 0.90      | 0.65      | 1 (ref) | 1.14      | 2.78      | 5.48      | 12.22      |
| 95% CI       | 0.54-1.53 | 0.45-0.95 |         | 0.84-1.56 | 2.00-3.87 | 3.93-6.94 | 8.88-16.84 |
| P            | 0.70      | 0.025     |         | 0.39      | <0.001    | <0.001    | <0.001     |

## SUPPLEMENTARY DATA

**Supplementary Table S6. Sensitivity analysis restricted to participants examined between 1967 and 1977: Unadjusted and multivariable adjusted Cox models** (for age at examination, birth year, and sex [Model 1], and additionally for socio-economic status, country of origin, education level and height [Model 2]). The 395,324 adolescents examined during this period yielded 417 DM deaths (86.7% of the total DM deaths). To enable comparison with the full sample, hazard ratios of the main analysis (unadjusted and model 2 adjusted, Table 2) are shown. The estimates were similar.

### (a) BMI classified by US-CDC percentiles

|                                | <5 <sup>th</sup> | 5 <sup>th</sup> -24 <sup>th</sup> | 25 <sup>th</sup> -49 <sup>th</sup> | 50 <sup>th</sup> -74 <sup>th</sup> | 75 <sup>th</sup> -84 <sup>th</sup> | 85 <sup>th</sup> -94 <sup>th</sup> | ≥95 <sup>th</sup> |
|--------------------------------|------------------|-----------------------------------|------------------------------------|------------------------------------|------------------------------------|------------------------------------|-------------------|
| N                              | 22,600           | 82,894                            | 114,168                            | 106,033                            | 35,449                             | 26,831                             | 7,349             |
| Cases                          | 15               | 41                                | 78                                 | 75                                 | 57                                 | 91                                 | 60                |
| HR (unadjusted)                | 1.34             | 1 (ref)                           | 1.38                               | 1.43                               | 3.27                               | 6.92                               | 17.06             |
| 95% CI                         | 0.75-2.43        |                                   | 0.95-2.01                          | 0.98-2.09                          | 2.19-4.88                          | 4.79-10.00                         | 11.47-25.38       |
| P                              | 0.32             |                                   | 0.096                              | 0.065                              | <0.001                             | <0.001                             | <0.001            |
| HR (unadjusted, main analysis) | 1.31             | 1 (ref)                           | 1.41                               | 1.48                               | 3.51                               | 7.11                               | 17.53             |
| 95% CI                         | 0.76-2.26        |                                   | 0.99-2.01                          | 1.04-2.12                          | 2.42-5.10                          | 5.04-10.04                         | 12.16-25.26       |
| P                              | 0.33             |                                   | 0.059                              | 0.031                              | <0.001                             | <0.001                             | <0.001            |
| HR (model 1)                   | 1.30             | 1 (ref)                           | 1.43                               | 1.52                               | 3.52                               | 7.21                               | 15.71             |
| 95% CI                         | 0.72-2.35        |                                   | 0.98-2.08                          | 1.04-2.22                          | 2.35-5.26                          | 4.99-10.43                         | 10.56-23.68       |
| P                              | 0.38             |                                   | 0.066                              | 0.032                              | <0.001                             | <0.001                             | <0.001            |
| HR (model 1, main analysis)    | 1.32             | 1 (ref)                           | 1.41                               | 1.52                               | 3.71                               | 7.38                               | 16.98             |
| 95% CI                         | 0.77-2.27        |                                   | 0.99-2.01                          | 1.06-2.17                          | 2.55-5.38                          | 5.23-10.42                         | 11.77-24.48       |
| P                              | 0.32             |                                   | 0.055                              | 0.021                              | <0.001                             | <0.001                             | <0.001            |
| HR (model 2)                   | 1.29             | 1 (ref)                           | 1.45                               | 1.59                               | 3.68                               | 7.55                               | 15.88             |
| 95% CI                         | 0.71-2.26        |                                   | 1.00-2.11                          | 1.09-2.37                          | 2.51-5.66                          | 5.2-10.72                          | 10.69-23.82       |
| P                              | 0.44             |                                   | 0.051                              | 0.011                              | <0.001                             | <0.001                             | <0.001            |
| HR (model 2, main analysis)    | 1.29             | 1 (ref)                           | 1.46                               | 1.64                               | 4.09                               | 8.02                               | 17.17             |
| 95% CI                         | 0.75-2.23        |                                   | 1.02-2.08                          | 1.14-2.34                          | 2.81-5.95                          | 5.66-11.34                         | 11.87-24.83       |
| P                              | 0.35             |                                   | 0.038                              | 0.007                              | <0.001                             | <0.001                             | <0.001            |

### (a) BMI classified by kg/m<sup>2</sup>

| BMI range                      | <17.5     | 17.5-19.9 | 20.0-22.4 | 22.5-24.9 | 25.0-27.4 | 27.5-29.9  | ≥30.0       |
|--------------------------------|-----------|-----------|-----------|-----------|-----------|------------|-------------|
| HR (unadjusted)                | 1.10      | 1 (ref)   | 1.33      | 2.35      | 5.90      | 8.44       | 19.19       |
| 95% CI                         | 0.55-2.22 |           | 0.97-1.84 | 1.69-3.28 | 4.19-8.31 | 5.57-12.81 | 13.00-28.33 |
| P                              | 0.79      |           | 0.081     | <0.001    | <0.001    | <0.001     | <0.001      |
| HR (unadjusted, main analysis) | 1.06      | 1 (ref)   | 1.40      | 2.50      | 6.33      | 8.88       | 18.83       |
| 95% CI                         | 0.56-2.01 |           | 1.03-1.89 | 1.84-3.42 | 4.60-8.71 | 6.05-13.05 | 13.16-26.94 |
| P                              | 0.86      |           | 0.029     | <0.001    | <0.001    | <0.001     | <0.001      |
| HR (model 1)                   | 1.15      | 1 (ref)   | 1.30      | 2.33      | 5.83      | 8.37       | 18.95       |
| 95% CI                         | 0.58-2.32 |           | 0.94-1.78 | 1.67-3.24 | 4.15-8.22 | 5.52-12.68 | 12.83-27.97 |
| P                              | 0.60      |           | 0.11      | <0.001    | <0.001    | <0.001     | <0.001      |
| HR (model 1, main analysis)    | 1.19      | 1 (ref)   | 1.31      | 2.38      | 6.08      | 8.88       | 20.04       |
| 95% CI                         | 0.63-2.25 |           | 0.97-1.77 | 1.74-3.24 | 4.42-8.37 | 6.05-13.05 | 14.11-28.67 |



## SUPPLEMENTARY DATA

|                             |           |         |           |           |           |            |             |
|-----------------------------|-----------|---------|-----------|-----------|-----------|------------|-------------|
| P                           | 0.60      |         | 0.083     | <0.001    | <0.001    | <0.001     | <0.001      |
| HR (model 2)                | 1.12      | 1 (ref) | 1.36      | 2.64      | 6.74      | 9.35       | 19.53       |
| 95% CI                      | 0.56-2.26 |         | 0.99-1.88 | 1.90-3.69 | 4.78-9.51 | 6.15-14.22 | 13.19-28.93 |
| P                           | 0.75      |         | 0.059     | <0.001    | <0.001    | <0.001     | <0.001      |
| HR (model 2, main analysis) | 1.16      | 1 (ref) | 1.37      | 2.68      | 6.94      | 9.81       | 20.38       |
| 95% CI                      | 0.61-2.20 |         | 1.01-1.85 | 1.97-3.66 | 5.03-9.57 | 6.67-14.44 | 14.20-29.23 |
| P                           | 0.65      |         | 0.041     | <0.001    | <0.001    | <0.001     | <0.001      |

# SUPPLEMENTARY DATA

**Supplementary Table S7. The association between adolescent BMI and DM mortality with follow-up commencing at the age of the baseline examination (16-19 y) for all participants.** The Cox models for deaths attributed to DM were computed with follow-up beginning at age 16-19. To facilitate comparison with the main analysis presented in Table 2 in which the follow-up for those examined before 1981 began at their attained ages in 1981, the results of the main analysis are also shown. Models were defined as described in Table 2.

|                                | <5 <sup>th</sup> | 5 <sup>th</sup> -24 <sup>th</sup> | 25 <sup>th</sup> -49 <sup>th</sup> | 50 <sup>th</sup> -74 <sup>th</sup> | 75 <sup>th</sup> -84 <sup>th</sup> | 85 <sup>th</sup> -94 <sup>th</sup> | ≥95 <sup>th</sup> |
|--------------------------------|------------------|-----------------------------------|------------------------------------|------------------------------------|------------------------------------|------------------------------------|-------------------|
| HR (unadjusted)                | 1.42             | 1 (ref)                           | 1.34                               | 1.38                               | 3.26                               | 6.81                               | 17.84             |
| 95% CI                         | 0.83-2.45        |                                   | 0.94-1.91                          | 0.96-1.97                          | 2.25-4.75                          | 4.83-9.62                          | 12.36-25.73       |
| P                              | 0.21             |                                   | 0.11                               | 0.081                              | <0.001                             | <0.001                             | <0.001            |
| HR (main analysis, unadjusted) | 1.31             | 1 (ref)                           | 1.41                               | 1.48                               | 3.51                               | 7.11                               | 17.53             |
| 95% CI                         | 0.76-2.26        |                                   | 0.99-2.01                          | 1.04-2.12                          | 2.42-5.10                          | 5.04-10.04                         | 12.16-25.26       |
| P                              | 0.33             |                                   | 0.059                              | 0.031                              | <0.001                             | <0.001                             | <0.001            |
| HR (model 1)                   | 1.33             | 1 (ref)                           | 1.41                               | 1.50                               | 3.63                               | 7.32                               | 16.61             |
| 95% CI                         | 0.77-2.28        |                                   | 0.99-2.01                          | 1.05-2.14                          | 2.50-5.28                          | 5.19-10.34                         | 11.51-23.97       |
| P                              | 0.31             |                                   | 0.058                              | 0.027                              | <0.001                             | <0.001                             | <0.001            |
| HR (main analysis, model 1)    | 1.32             | 1 (ref)                           | 1.41                               | 1.52                               | 3.71                               | 7.38                               | 16.98             |
| 95% CI                         | 0.77-2.27        |                                   | 0.99-2.01                          | 1.06-2.17                          | 2.55-5.38                          | 5.23-10.42                         | 11.77-24.48       |
| P                              | 0.32             |                                   | 0.055                              | 0.021                              | <0.001                             | <0.001                             | <0.001            |
| HR (model 2)                   | 1.29             | 1 (ref)                           | 1.46                               | 1.62                               | 4.03                               | 8.00                               | 16.85             |
| 95% CI                         | 0.75-2.22        |                                   | 1.02-2.08                          | 1.13-2.32                          | 2.76-5.87                          | 5.65-11.32                         | 11.63-24.40       |
| P                              | 0.36             |                                   | 0.037                              | 0.008                              | <0.001                             | <0.001                             | <0.001            |
| HR (main analysis, model 2)    | 1.29             | 1 (ref)                           | 1.46                               | 1.64                               | 4.09                               | 8.02                               | 17.17             |
| 95% CI                         | 0.75-2.23        |                                   | 1.02-2.08                          | 1.14-2.34                          | 2.81-5.95                          | 5.66-11.34                         | 11.87-24.83       |
| P                              | 0.35             |                                   | 0.038                              | 0.007                              | <0.001                             | <0.001                             | <0.001            |

# SUPPLEMENTARY DATA

**Supplementary Table S8. Competing risk.** The Cox models for deaths attributed to DM were computed with non-DM mortality as the competing event. Models were unadjusted, adjusted for age at examination, birth year and sex, residential socioeconomic status, education, country of origin and height to the model (model 2). For comparison, the results of the same analysis, but without competing risk are shown (labelled as main analysis). Note that accounting for competing events had a minor effect on the associations.

|                                | <5 <sup>th</sup> | 5 <sup>th</sup> -24 <sup>th</sup> | 25 <sup>th</sup> -49 <sup>th</sup> | 50 <sup>th</sup> -74 <sup>th</sup> | 75 <sup>th</sup> -84 <sup>th</sup> | 85 <sup>th</sup> -94 <sup>th</sup> | ≥95 <sup>th</sup> |
|--------------------------------|------------------|-----------------------------------|------------------------------------|------------------------------------|------------------------------------|------------------------------------|-------------------|
| HR (unadjusted)                | 1.31             | 1 (ref)                           | 1.41                               | 1.48                               | 3.51                               | 7.08                               | 17.18             |
| 95% CI                         | 0.76-2.25        |                                   | 0.99-2.01                          | 1.04-2.12                          | 2.41-5.09                          | 5.01-9.90                          | 11.91-24.77       |
| P                              | 0.33             |                                   | 0.060                              | 0.025                              | <0.001                             | <0.001                             | <0.001            |
| HR (main analysis, unadjusted) | 1.31             | 1 (ref)                           | 1.41                               | 1.48                               | 3.51                               | 7.11                               | 17.53             |
| 95% CI                         | 0.76-2.26        |                                   | 0.99-2.01                          | 1.04-2.12                          | 2.42-5.10                          | 5.04-10.04                         | 12.16-25.26       |
| P                              | 0.33             |                                   | 0.059                              | 0.031                              | <0.001                             | <0.001                             | <0.001            |
| HR (model 2)                   | 1.31             | 1 (ref)                           | 1.45                               | 1.63                               | 4.06                               | 7.95                               | 16.77             |
| 95% CI                         | 0.76-2.25        |                                   | 1.02-2.08                          | 1.14-2.34                          | 2.79-5.91                          | 5.62-11.24                         | 11.63-24.18       |
| P                              | 0.30             |                                   | 0.040                              | 0.008                              | <0.001                             | <0.001                             | <0.001            |
| HR (main analysis, model 2)    | 1.29             | 1 (ref)                           | 1.46                               | 1.64                               | 4.09                               | 8.02                               | 17.17             |
| 95% CI                         | 0.75-2.23        |                                   | 1.02-2.08                          | 1.14-2.34                          | 2.81-5.95                          | 5.66-11.34                         | 11.87-24.83       |
| P                              | 0.35             |                                   | 0.038                              | 0.007                              | <0.001                             | <0.001                             | <0.001            |

# SUPPLEMENTARY DATA

**Supplementary Table S9. Cox proportional hazards analysis of the association of adolescent BMI with DM mortality using the currently defined normal BMI (CDC BMI percentiles 5<sup>th</sup>-84<sup>th</sup>) as the reference.** Analysis is presented in two modes: (a) when elevated BMI is separated into overweight and obesity, or (b) pooled as a single group.

(a)

|                 | <5 <sup>th</sup> | 5 <sup>th</sup> -84 <sup>th</sup> | 85 <sup>th</sup> -94 <sup>th</sup> | ≥95 <sup>th</sup> |
|-----------------|------------------|-----------------------------------|------------------------------------|-------------------|
| HR (unadjusted) | 0.97             | 1 (ref)                           | 4.63                               | 12.13             |
| 95% CI          | 0.60-1.56        |                                   | 3.70-5.81                          | 9.38-15.70        |
| P               | 0.89             |                                   | <0.001                             | <0.001            |
| HR (model 1)    | 0.86             | 1 (ref)                           | 4.71                               | 10.73             |
| 95% CI          | 0.53-1.38        |                                   | 3.76-5.90                          | 8.28-13.88        |
| P               | 0.53             |                                   | <0.001                             | <0.001            |
| HR (model 2)    | 0.81             | 1 (ref)                           | 4.87                               | 10.31             |
| 95% CI          | 0.50-1.30        |                                   | 3.89-6.12                          | 7.93-13.39        |
| P               | 0.37             |                                   | <0.001                             | <0.001            |

(b)

|                 | <5 <sup>th</sup> | 5 <sup>th</sup> -84 <sup>th</sup> | ≥85 <sup>th</sup> |
|-----------------|------------------|-----------------------------------|-------------------|
| HR (unadjusted) | 0.97             | 1 (ref)                           | 6.22              |
| 95% CI          | 0.60-1.56        |                                   | 5.15-7.51         |
| P               | 0.88             |                                   | <0.001            |
| HR (model 1)    | 0.86             | 1 (ref)                           | 6.12              |
| 95% CI          | 0.53-1.38        |                                   | 5.08-7.39         |
| P               | 0.52             |                                   | <0.001            |
| HR (model 2)    | 0.80             | 1 (ref)                           | 6.21              |
| 95% CI          | 0.49-1.29        |                                   | 5.14-7.52         |
| P               | 0.36             |                                   | <0.001            |

# SUPPLEMENTARY DATA

**Supplementary Table S10. The association between adolescent BMI and DM mortality stratified by deaths occurring in younger ( $\leq 50$  years) and older adults ( $> 50$  years): unadjusted and multivariable adjusted Cox models (adjusted for age at examination, birth year, and sex [Model 1], and additionally for socio-economic status, country of origin, education level and height [Model 2]).**

|                                                                                                            |                 | $<5^{\text{th}}$ | $5^{\text{th}}-24^{\text{th}}$ | $25^{\text{th}}-49^{\text{th}}$ | $50^{\text{th}}-74^{\text{th}}$ | $75^{\text{th}}-84^{\text{th}}$ | $85^{\text{th}}-94^{\text{th}}$ | $\geq 95^{\text{th}}$ |
|------------------------------------------------------------------------------------------------------------|-----------------|------------------|--------------------------------|---------------------------------|---------------------------------|---------------------------------|---------------------------------|-----------------------|
| <b>Diabetes Mortality (<math>\leq 50</math> years, 201 deaths; <math>&gt; 50</math> years, 280 deaths)</b> |                 |                  |                                |                                 |                                 |                                 |                                 |                       |
| $\leq 50$ years                                                                                            | N of deaths     | 8                | 19                             | 28                              | 34                              | 25                              | 50                              | 37                    |
|                                                                                                            | HR (unadjusted) | 1.38             | 1 (ref)                        | 1.15                            | 1.53                            | 3.29                            | 8.38                            | 19.92                 |
|                                                                                                            | 95% CI          | 0.60-3.15        |                                | 0.64-2.07                       | 0.87-2.68                       | 1.81-5.97                       | 4.94-14.22                      | 11.45-34.65           |
|                                                                                                            | P               | 0.45             |                                | 0.63                            | 0.14                            | $<0.001$                        | $<0.001$                        | $<0.001$              |
|                                                                                                            | HR (model 1)    | 1.37             | 1 (ref)                        | 1.17                            | 1.61                            | 3.64                            | 9.31                            | 20.89                 |
|                                                                                                            | 95% CI          | 0.60-3.13        |                                | 0.65-2.09                       | 0.92-2.82                       | 2.01-6.62                       | 5.49-15.80                      | 12.01-36.35           |
|                                                                                                            | P               | 0.45             |                                | 0.60                            | 0.097                           | $<0.001$                        | $<0.001$                        | $<0.001$              |
|                                                                                                            | HR (model 2)    | 1.35             | 1 (ref)                        | 1.19                            | 1.69                            | 3.92                            | 9.85                            | 20.68                 |
|                                                                                                            | 95% CI          | 0.59-3.10        |                                | 0.67-2.13                       | 0.99-2.97                       | 2.15-7.13                       | 5.79-16.77                      | 11.84-36.13           |
|                                                                                                            | P               | 0.47             |                                | 0.56                            | 0.052                           | $<0.001$                        | $<0.001$                        | $<0.001$              |
| $> 50$ years                                                                                               | N of deaths     | 10               | 28                             | 59                              | 50                              | 42                              | 54                              | 37                    |
|                                                                                                            | HR (unadjusted) | 1.30             | 1 (ref)                        | 1.54                            | 1.41                            | 3.57                            | 6.10                            | 15.53                 |
|                                                                                                            | 95% CI          | 0.63-2.67        |                                | 0.98-2.42                       | 0.89-2.23                       | 2.21-5.76                       | 3.87-9.63                       | 9.51-25.38            |
|                                                                                                            | P               | 0.48             |                                | 0.060                           | 0.15                            | $<0.001$                        | $<0.001$                        | $<0.001$              |
|                                                                                                            | HR (model 1)    | 1.29             | 1 (ref)                        | 1.57                            | 1.46                            | 3.74                            | 6.18                            | 14.30                 |
|                                                                                                            | 95% CI          | 0.63-2.65        |                                | 1.00-2.56                       | 0.92-2.33                       | 2.32-6.04                       | 3.91-9.76                       | 8.75-23.36            |
|                                                                                                            | P               | 0.49             |                                | 0.051                           | 0.107                           | $<0.001$                        | $<0.001$                        | $<0.001$              |
|                                                                                                            | HR (model 2)    | 1.24             | 1 (ref)                        | 1.63                            | 1.60                            | 4.20                            | 6.83                            | 14.67                 |
|                                                                                                            | 95% CI          | 0.60-2.57        |                                | 1.04-2.55                       | 1.10-2.58                       | 2.60-6.79                       | 4.31-10.82                      | 8.93-24.08            |
|                                                                                                            | P               | 0.55             |                                | 0.034                           | 0.047                           | $<0.001$                        | $<0.001$                        | $<0.001$              |

## SUPPLEMENTARY DATA

**Supplementary Table S11. Analysis of the association of BMI with DM mortality for adolescents attaining age 35 years or older during the follow-up.** This analysis was restricted to 1,203,855 adolescents (56.6% of the cohort) whose medical examination revealed no current chronic medical condition, no chronic medical treatment and no previous history of such conditions that affect physical fitness. In this subcohort, there were 468 deaths attributed to DM during follow-up. Cox proportional hazards models were adjusted for age at examination, birth year, and sex (Model 1), and additionally for socio-economic status, country of origin, education level and height (Model 2).

**(a) BMI  
classified by  
US-CDC  
percentiles**

| <b>BMI percentiles</b> | <b>&lt;5<sup>th</sup></b> | <b>5<sup>th</sup>-24<sup>th</sup></b> | <b>25<sup>th</sup>-49<sup>th</sup></b> | <b>50<sup>th</sup>-74<sup>th</sup></b> | <b>75<sup>th</sup>-84<sup>th</sup></b> | <b>85<sup>th</sup>-94<sup>th</sup></b> | <b>≥95<sup>th</sup></b> |
|------------------------|---------------------------|---------------------------------------|----------------------------------------|----------------------------------------|----------------------------------------|----------------------------------------|-------------------------|
| HR (unadjusted)        | 1.30                      | 1 (ref)                               | 1.40                                   | 1.51                                   | 3.62                                   | 7.33                                   | 18.38                   |
| 95% CI                 | 0.74-2.26                 |                                       | 0.98-2.01                              | 1.05-2.17                              | 2.48-5.29                              | 5.16-10.41                             | 12.68-26.66             |
| P                      | 0.36                      |                                       | 0.07                                   | 0.031                                  | <0.001                                 | <0.001                                 | <0.001                  |
| HR (model 1)           | 1.31                      | 1 (ref)                               | 1.41                                   | 1.55                                   | 3.83                                   | 7.60                                   | 17.62                   |
| 95% CI                 | 0.75-2.28                 |                                       | 0.98-2.02                              | 1.08-2.23                              | 2.62-5.59                              | 5.35-10.79                             | 12.15-25.55             |
| P                      | 0.35                      |                                       | 0.072                                  | 0.021                                  | <0.001                                 | <0.001                                 | <0.001                  |
| HR (model 2)           | 1.28                      | 1 (ref)                               | 1.45                                   | 1.67                                   | 4.23                                   | 8.29                                   | 17.94                   |
| 95% CI                 | 0.73-2.24                 |                                       | 1.01-2.09                              | 1.16-2.41                              | 2.89-6.19                              | 5.82-11.80                             | 12.33-26.14             |
| P                      | 0.39                      |                                       | 0.045                                  | 0.006                                  | <0.001                                 | <0.001                                 | <0.001                  |

**(b) BMI classified by kg/m<sup>2</sup>**

| <b>BMI range</b> | <b>&lt;17.5</b> | <b>17.5-19.9</b> | <b>20.0-22.4</b> | <b>22.5-24.9</b> | <b>25.0-27.4</b> | <b>27.5-29.9</b> | <b>≥30.0</b> |
|------------------|-----------------|------------------|------------------|------------------|------------------|------------------|--------------|
| HR (unadjusted)  | 1.01            | 1 (ref)          | 1.41             | 2.57             | 6.66             | 8.95             | 19.78        |
| 95% CI           | 0.52-1.98       |                  | 1.04-1.92        | 1.88-3.53        | 4.82-9.20        | 6.04-13.27       | 13.75-28.45  |
| P                | 0.95            |                  | 0.031            | <0.001           | <0.001           | <0.001           | <0.001       |
| HR (model 1)     | 1.14            | 1 (ref)          | 1.32             | 2.44             | 6.39             | 8.94             | 20.88        |
| 95% CI           | 0.58-2.22       |                  | 0.97-1.79        | 1.78-3.35        | 4.62-8.84        | 6.03-13.25       | 14.52-30.04  |
| P                | 0.71            |                  | 0.074            | <0.001           | <0.001           | <0.001           | <0.001       |
| HR (model 2)     | 1.11            | 1 (ref)          | 1.39             | 2.70             | 7.11             | 9.62             | 20.84        |
| 95% CI           | 0.57-2.16       |                  | 1.02-1.895       | 1.97-3.71        | 5.13-9.85        | 6.47-14.30       | 14.43-30.08  |
| P                | 0.76            |                  | 0.038            | <0.001           | <0.001           | <0.001           | <0.001       |

# SUPPLEMENTARY DATA

## Supplementary Table S12. Analysis of the association of adolescent BMI with DM mortality after excluding examinees with known diabetes at age 17.

The current analysis excludes 2,417 participants with an established diagnosis of diabetes at enrollment, of which 30 died during the study period (we lack formal diagnoses of the exact type of diabetes of these patients, but assume the majority to be T1DM). Of note, the underlying causes of death for the 30 deaths among participants with diabetes at enrolment were DM (33%; n=10), CHD (13%; n=4), trauma (13%; n=4), cancer (10%; n=3; including one case of pancreatic cancer), complications related to cystic fibrosis or HIV (7%; n=2), sepsis (3%; n=1), undetermined (17%, n=5), and missing (3%; n=1).

Cox proportional hazards models were unadjusted, or adjusted for age at examination, birth year, and sex (Model 1), and additionally for socio-economic status, country of origin, education level and height (Model 2). It is evident that for all models the association was as strong as that shown in the main analysis of Table 2 (presented here to facilitate comparison).

| BMI percentiles                | <5 <sup>th</sup> | 5 <sup>th</sup> -24 <sup>th</sup> | 25 <sup>th</sup> -49 <sup>th</sup> | 50 <sup>th</sup> -74 <sup>th</sup> | 75 <sup>th</sup> -84 <sup>th</sup> | 85 <sup>th</sup> -94 <sup>th</sup> | ≥95 <sup>th</sup> |
|--------------------------------|------------------|-----------------------------------|------------------------------------|------------------------------------|------------------------------------|------------------------------------|-------------------|
| HR (unadjusted)                | 1.17             | 1 (ref)                           | 1.52                               | 1.62                               | 3.73                               | 7.63                               | 18.35             |
| 95% CI                         | 0.64-2.15        |                                   | 1.04-2.21                          | 1.10-2.35                          | 2.51-5.53                          | 5.30-10.99                         | 12.44-27.10       |
| P                              | 0.61             |                                   | 0.029                              | 0.013                              | <0.001                             | <0.001                             | <0.001            |
| HR (unadjusted, main analysis) | 1.31             | 1 (ref)                           | 1.41                               | 1.48                               | 3.51                               | 7.11                               | 17.53             |
| 95% CI                         | 0.76-2.26        |                                   | 0.99-2.01                          | 1.04-2.12                          | 2.42-5.10                          | 5.04-10.04                         | 12.16-25.26       |
| P                              | 0.33             |                                   | 0.059                              | 0.031                              | <0.001                             | <0.001                             | <0.001            |
| HR (model 1)                   | 1.18             | 1 (ref)                           | 1.53                               | 1.66                               | 3.94                               | 7.91                               | 17.64             |
| 95% CI                         | 0.64-2.16        |                                   | 1.05-2.22                          | 1.14-2.43                          | 2.66-5.85                          | 5.49-11.39                         | 11.96-26.03       |
| P                              | 0.59             |                                   | 0.027                              | 0.008                              | <0.001                             | <0.001                             | <0.001            |
| HR (model 1, main analysis)    | 1.32             | 1 (ref)                           | 1.41                               | 1.52                               | 3.71                               | 7.38                               | 16.98             |
| 95% CI                         | 0.77-2.27        |                                   | 0.99-2.01                          | 1.06-2.17                          | 2.55-5.38                          | 5.23-10.42                         | 11.77-24.48       |
| P                              | 0.32             |                                   | 0.055                              | 0.021                              | <0.001                             | <0.001                             | <0.001            |
| HR (model 2)                   | 1.15             | 1 (ref)                           | 1.58                               | 1.80                               | 4.38                               | 8.67                               | 18.04             |
| 95% CI                         | 0.63-2.11        |                                   | 1.09-2.30                          | 1.63-2.62                          | 2.95-6.51                          | 6.00-12.53                         | 12.19-26.70       |
| P                              | 0.65             |                                   | 0.017                              | 0.002                              | <0.001                             | <0.001                             | <0.001            |
| HR (model 2, main analysis)    | 1.29             | 1 (ref)                           | 1.46                               | 1.64                               | 4.09                               | 8.02                               | 17.17             |
| 95% CI                         | 0.75-2.23        |                                   | 1.02-2.08                          | 1.14-2.34                          | 2.81-5.95                          | 5.66-11.34                         | 11.87-24.83       |
| P                              | 0.35             |                                   | 0.038                              | 0.007                              | <0.001                             | <0.001                             | <0.001            |

# SUPPLEMENTARY DATA

## Supplementary Table S13. Analysis of the association of adolescent BMI with DM mortality after excluding Type 1 diabetes deaths.

In this analysis deaths ascribed to type 1 diabetes (n=38; E10.000, E10.100, E10.200, E10.400, E10.500, E10.700, E10.900, 250.010, 250410) were excluded from analysis leaving 443 DM deaths. Cox proportional hazards models were unadjusted, or adjusted for age at examination, birth year, and sex (Model 1), and additionally for socio-economic status, country of origin, education level and height (Model 2). It is evident that for all models the association was as strong as that shown in the main analysis of Table 2 (shown here to facilitate comparison).

| BMI percentiles                | <5 <sup>th</sup> | 5 <sup>th</sup> -24 <sup>th</sup> | 25 <sup>th</sup> -49 <sup>th</sup> | 50 <sup>th</sup> -74 <sup>th</sup> | 75 <sup>th</sup> -84 <sup>th</sup> | 85 <sup>th</sup> -94 <sup>th</sup> | ≥95 <sup>th</sup> |
|--------------------------------|------------------|-----------------------------------|------------------------------------|------------------------------------|------------------------------------|------------------------------------|-------------------|
| HR (unadjusted)                | 1.27             | 1 (ref)                           | 1.42                               | 1.46                               | 3.54                               | 7.14                               | 17.76             |
| 95% CI                         | 0.73-2.21        |                                   | 0.99-2.03                          | 1.02-2.10                          | 2.43-5.16                          | 5.04-10.11                         | 12.28-25.69       |
| P                              | 0.41             |                                   | 0.054                              | 0.041                              | <0.001                             | <0.001                             | <0.001            |
| HR (unadjusted, main analysis) | 1.31             | 1 (ref)                           | 1.41                               | 1.48                               | 3.51                               | 7.11                               | 17.53             |
| 95% CI                         | 0.76-2.26        |                                   | 0.99-2.01                          | 1.04-2.12                          | 2.42-5.10                          | 5.04-10.04                         | 12.16-25.26       |
| P                              | 0.33             |                                   | 0.059                              | 0.031                              | <0.001                             | <0.001                             | <0.001            |
| HR (model 1)                   | 1.28             | 1 (ref)                           | 1.43                               | 1.50                               | 3.74                               | 7.41                               | 17.16             |
| 95% CI                         | 0.73-2.23        |                                   | 1.00-2.04                          | 1.05-2.16                          | 2.57-5.45                          | 5.23-10.50                         | 11.86-24.82       |
| P                              | 0.39             |                                   | 0.051                              | 0.028                              | <0.001                             | <0.001                             | <0.001            |
| HR (model 1, main analysis)    | 1.32             | 1 (ref)                           | 1.41                               | 1.52                               | 3.71                               | 7.38                               | 16.98             |
| 95% CI                         | 0.77-2.27        |                                   | 0.99-2.01                          | 1.06-2.17                          | 2.55-5.38                          | 5.23-10.42                         | 11.77-24.48       |
| P                              | 0.32             |                                   | 0.055                              | 0.021                              | <0.001                             | <0.001                             | <0.001            |
| HR (model 2)                   | 1.25             | 1 (ref)                           | 1.47                               | 1.61                               | 4.12                               | 8.06                               | 17.41             |
| 95% CI                         | 0.72-2.18        |                                   | 1.03-2.10                          | 1.12-2.32                          | 2.82-6.02                          | 5.67-11.44                         | 12.00-25.27       |
| P                              | 0.43             |                                   | 0.035                              | 0.010                              | <0.001                             | <0.001                             | <0.001            |
| HR (model 2, main analysis)    | 1.29             | 1 (ref)                           | 1.46                               | 1.64                               | 4.09                               | 8.02                               | 17.17             |
| 95% CI                         | 0.75-2.23        |                                   | 1.02-2.08                          | 1.14-2.34                          | 2.81-5.95                          | 5.66-11.34                         | 11.87-24.83       |
| P                              | 0.35             |                                   | 0.038                              | 0.007                              | <0.001                             | <0.001                             | <0.001            |



# SUPPLEMENTARY DATA

## Supplementary Table S14. Analysis of the association of adolescent BMI with mortality ascribed to Type 2 diabetes or unspecified diabetes.

We stratified the deaths attributed to diabetes by those relating to Type 2 (a; n=168) and to those to diabetes of unspecified type (b; n=245). There were only 35 deaths relating to Type 1 Diabetes (not shown). Data presented here are for ICD-10 classified diagnoses (ie. starting from 1998 onwards), that include 93.1% of the total diabetes mortality in our cohort. Cox proportional hazards models were unadjusted, or adjusted for age at examination, birth year, and sex (Model 1), and additionally for socio-economic status, country of origin, education level and height (Model 2). It is evident that for both Type 2 and diabetes of unspecified type, increased risk was evident in the age- and sex- adjusted model (model 1) at the 50<sup>th</sup> -74<sup>th</sup> percentiles, although the association of BMI with Type 2 Diabetes appears to be stronger, likely partly reflecting the effect of removing those with Type 1.

### (a) Type 2 Diabetes (n=168)

|                                | <5 <sup>th</sup> | 5 <sup>th</sup> -24 <sup>th</sup> | 25 <sup>th</sup> -49 <sup>th</sup> | 50 <sup>th</sup> -74 <sup>th</sup> | 75 <sup>th</sup> -84 <sup>th</sup> | 85 <sup>th</sup> -94 <sup>th</sup> | ≥95 <sup>th</sup> |
|--------------------------------|------------------|-----------------------------------|------------------------------------|------------------------------------|------------------------------------|------------------------------------|-------------------|
| Cases                          | 8                | 12                                | 21                                 | 30                                 | 26                                 | 41                                 | 30                |
| HR (unadjusted)                | 2.28             | 1 (ref)                           | 1.33                               | 2.07                               | 5.36                               | 11.06                              | 28.34             |
| 95% CI                         | 0.94-5.56        |                                   | 0.66-2.70                          | 1.06-4.05                          | 2.70-10.61                         | 5.81-21.04                         | 14.51-55.36       |
| P                              | 0.070            |                                   | 0.43                               | 0.033                              | <0.001                             | <0.001                             | <0.001            |
| HR (unadjusted, main analysis) | 1.31             | 1 (ref)                           | 1.41                               | 1.48                               | 3.51                               | 7.11                               | 17.53             |
| 95% CI                         | 0.76-2.26        |                                   | 0.99-2.01                          | 1.04-2.12                          | 2.42-5.10                          | 5.04-10.04                         | 12.16-25.26       |
| P                              | 0.33             |                                   | 0.059                              | 0.031                              | <0.001                             | <0.001                             | <0.001            |
| HR (model 1)                   | 2.33             | 1 (ref)                           | 1.32                               | 2.10                               | 5.56                               | 11.24                              | 27.05             |
| 95% CI                         | 0.95-5.71        |                                   | 0.65-2.69                          | 1.08-4.10                          | 2.80-11.01                         | 5.91-21.40                         | 13.84-52.85       |
| P                              | 0.063            |                                   | 0.44                               | 0.030                              | <0.001                             | <0.001                             | <0.001            |
| HR (model 1, main analysis)    | 1.32             | 1 (ref)                           | 1.41                               | 1.52                               | 3.71                               | 7.38                               | 16.98             |
| 95% CI                         | 0.77-2.27        |                                   | 0.99-2.01                          | 1.06-2.17                          | 2.55-5.38                          | 5.23-10.42                         | 11.77-24.48       |
| P                              | 0.32             |                                   | 0.055                              | 0.021                              | <0.001                             | <0.001                             | <0.001            |
| HR (model 2)                   | 2.27             | 1 (ref)                           | 1.38                               | 2.30                               | 6.29                               | 12.66                              | 28.34             |
| 95% CI                         | 0.93-5.57        |                                   | 0.68-2.80                          | 1.18-4.50                          | 3.17-12.50                         | 6.63-24.19                         | 14.51-55.36       |
| P                              | 0.072            |                                   | 0.40                               | 0.015                              | <0.001                             | <0.001                             | <0.001            |
| HR (model 2, main analysis)    | 1.29             | 1 (ref)                           | 1.46                               | 1.64                               | 4.09                               | 8.02                               | 17.17             |
| 95% CI                         | 0.75-2.23        |                                   | 1.02-2.08                          | 1.14-2.34                          | 2.81-5.95                          | 5.66-11.34                         | 11.87-24.83       |
| P                              | 0.35             |                                   | 0.038                              | 0.007                              | <0.001                             | <0.001                             | <0.001            |

# SUPPLEMENTARY DATA

## (b) Unspecified Type of Diabetes (n=245)

|                                | <5 <sup>th</sup> | 5 <sup>th</sup> -24 <sup>th</sup> | 25 <sup>th</sup> -49 <sup>th</sup> | 50 <sup>th</sup> -74 <sup>th</sup> | 75 <sup>th</sup> -84 <sup>th</sup> | 85 <sup>th</sup> -94 <sup>th</sup> | ≥95 <sup>th</sup> |
|--------------------------------|------------------|-----------------------------------|------------------------------------|------------------------------------|------------------------------------|------------------------------------|-------------------|
| Cases                          | 5                | 24                                | 55                                 | 46                                 | 33                                 | 51                                 | 31                |
| HR (unadjusted)                | 0.72             | 1 (ref)                           | 1.73                               | 1.58                               | 3.41                               | 6.94                               | 15.08             |
| 95% CI                         | 0.28-1.89        |                                   | 1.07-2.80                          | 0.97-2.60                          | 2.01-5.76                          | 4.28-11.28                         | 8.85-25.69        |
| P                              | 0.50             |                                   | 0.024                              | 0.060                              | <0.001                             | <0.001                             | <0.001            |
| HR (unadjusted, main analysis) | 1.31             | 1 (ref)                           | 1.41                               | 1.48                               | 3.51                               | 7.11                               | 17.53             |
| 95% CI                         | 0.76-2.26        |                                   | 0.99-2.01                          | 1.04-2.12                          | 2.42-5.10                          | 5.04-10.04                         | 12.16-25.26       |
| P                              | 0.33             |                                   | 0.059                              | 0.031                              | <0.001                             | <0.001                             | <0.001            |
| HR (model 1)                   | 0.71             | 1 (ref)                           | 1.77                               | 1.66                               | 3.65                               | 7.22                               | 13.93             |
| 95% CI                         | 0.27-1.86        |                                   | 1.09-2.85                          | 1.01-2.72                          | 2.16-6.19                          | 4.44-11.73                         | 8.17-23.74        |
| P                              | 0.48             |                                   | 0.020                              | 0.044                              | <0.001                             | <0.001                             | <0.001            |
| HR (model 1, main analysis)    | 1.32             | 1 (ref)                           | 1.41                               | 1.52                               | 3.71                               | 7.38                               | 16.98             |
| 95% CI                         | 0.77-2.27        |                                   | 0.99-2.01                          | 1.06-2.17                          | 2.55-5.38                          | 5.23-10.42                         | 11.77-24.48       |
| P                              | 0.32             |                                   | 0.055                              | 0.021                              | <0.001                             | <0.001                             | <0.001            |
| HR (model 2)                   | 0.69             | 1 (ref)                           | 1.83                               | 1.80                               | 4.08                               | 7.92                               | 14.21             |
| 95% CI                         | 0.26-1.80        |                                   | 1.13-2.96                          | 1.10-2.95                          | 2.40-6.91                          | 4.86-12.92                         | 8.30-24.32        |
| P                              | 0.44             |                                   | 0.013                              | 0.020                              | <0.001                             | <0.001                             | <0.001            |
| HR (model 2, main analysis)    | 1.29             | 1 (ref)                           | 1.46                               | 1.64                               | 4.09                               | 8.02                               | 17.17             |
| 95% CI                         | 0.75-2.23        |                                   | 1.02-2.08                          | 1.14-2.34                          | 2.81-5.95                          | 5.66-11.34                         | 11.87-24.83       |
| P                              | 0.35             |                                   | 0.038                              | 0.007                              | <0.001                             | <0.001                             | <0.001            |

## SUPPLEMENTARY DATA

**Supplementary Figure S1. The association between adolescent BMI grouped by US-CDC percentiles and diabetes mortality: Kaplan-Meier and unadjusted Cox survival analyses.** Note that in this analysis the follow-up started in 1967.

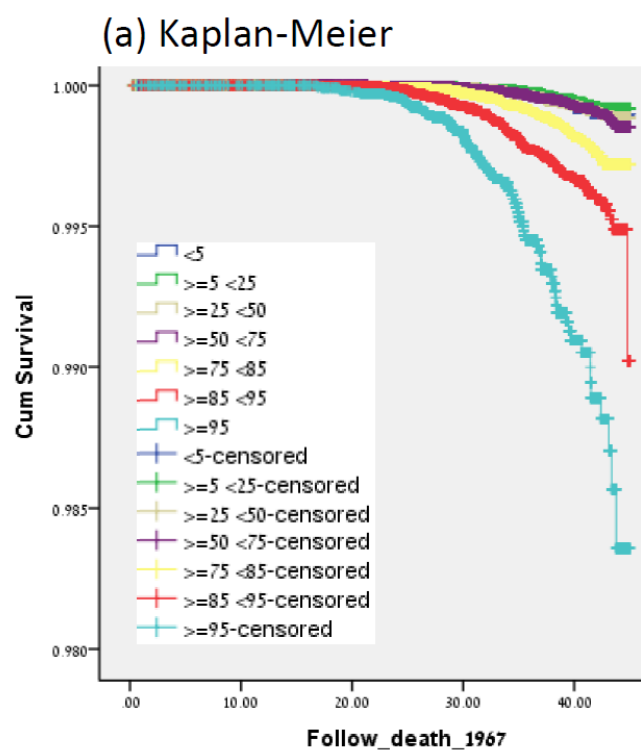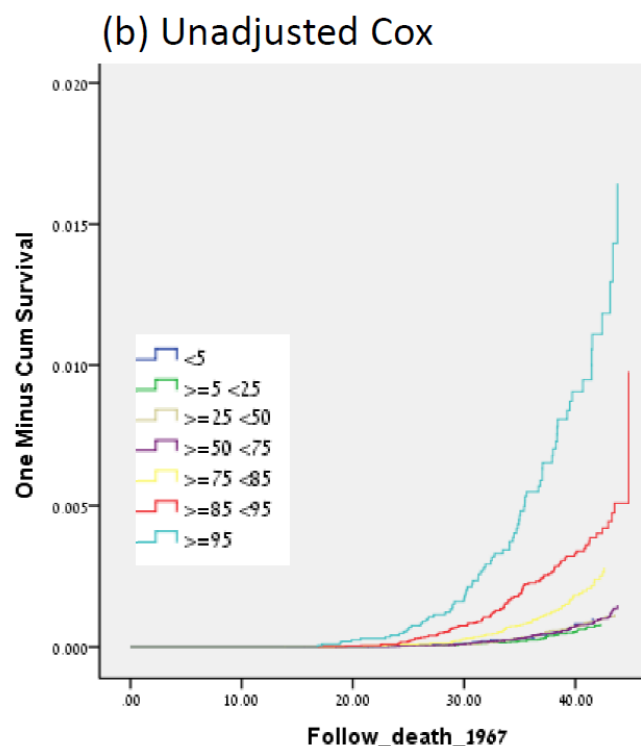

# SUPPLEMENTARY DATA

**Supplementary Figure S2. Multivariable-adjusted spline models for the association between adolescent BMI (in  $\text{kg/m}^2$ ) and DM and all-cause mortality.** The minimum risk for DM and all-cause mortality was observed at BMIs of 17.7 and 19.9  $\text{kg/m}^2$  (continuous arrows), respectively, whereas a significantly elevated risk became evident for adolescent BMI values above  $\sim 21.6 \text{ kg/m}^2$  (dashed arrow) for both outcomes. The model was adjusted for age, birth year, sex, residential socio-economic status, country of origin, education and height.

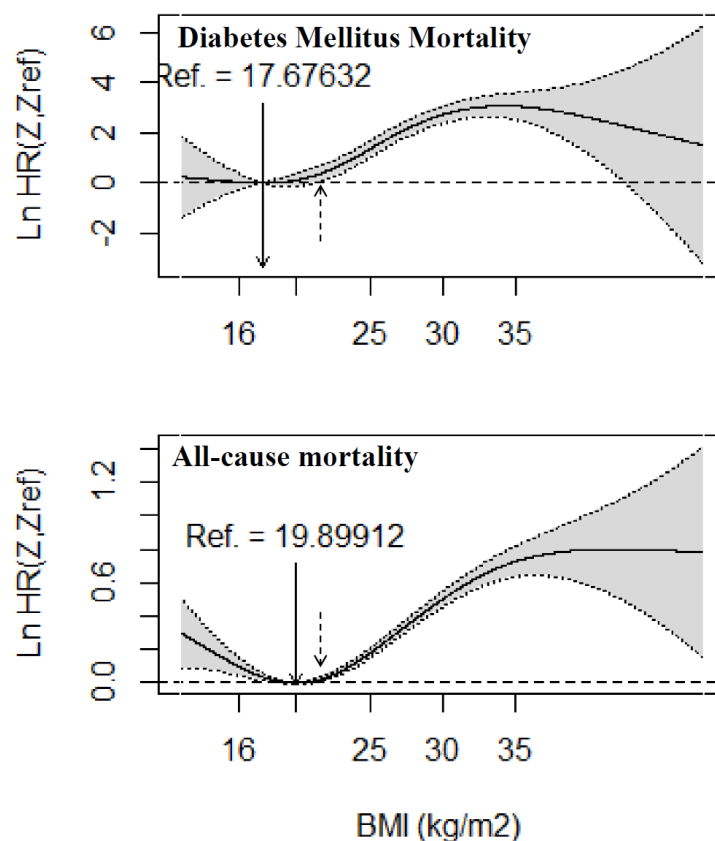

Supplement: dc161203supplementarydata.pdf [file dc161203supplementarydata.pdf]
